# Association between MCP-1 -2518A/G Polymorphism and Cancer Risk: Evidence from 19 Case-Control Studies

Liang-Shan Da<sup>1,2\*</sup>, Ying Zhang<sup>3,4\*</sup>, Shuai Zhang<sup>2</sup>, Yi-Chun Qian<sup>2</sup>, Qin Zhang<sup>2</sup>, Feng Jiang<sup>2\*</sup>, Lin Xu<sup>2\*</sup>

**1** The First Clinical College of Nanjing Medical University, Nanjing, Jiangsu, China, **2** Department of Thoracic Surgery, Nanjing Medical University Affiliated Cancer Hospital Cancer Institute of Jiangsu Province, Nanjing, Jiangsu, China, **3** Wannan Medical College, Wuhu, Anhui, China, **4** Department of Ultrasonic Medicine, Wannan Medical College Affiliated Yijishan Hospital, Wuhu, Anhui, China

## Abstract

**Background:** Single nucleotide polymorphisms (SNPs) may affect the development of diseases. The -2518A/G polymorphism in the regulatory region of the monocyte chemo-attractant protein-1 (MCP-1) gene has been reported to be associated with cancer risk. However, the results of previous studies were inconsistent. Therefore, we performed a meta-analysis to obtain a more precise estimation of the relationship between the -2518A/G polymorphism and cancer risk.

**Methodology/Principal Findings:** We performed a meta-analysis, including 4,162 cases and 5,173 controls, to evaluate the strength of the association between the -2518A/G polymorphism and cancer risk. Odds ratio (OR) and 95% confidence intervals (95% CIs) were used to assess the strength of association. Overall, the results indicated that the -2518A/G polymorphism was not statistically associated with cancer risk. However, sub-group analysis revealed that individuals with GG genotypes showed an increased risk of cancer in digestive system compared with carriers of the A allele (GG vs. AA: OR = 1.43, 95%CI = 1.05–1.96,  $P_{\text{heterogeneity}} = 0.08$ ; GG vs. AG/AA: OR = 1.29, 95%CI = 1.02–1.64,  $P_{\text{heterogeneity}} = 0.14$ ). In addition, the increased risk of GG genotype was also observed in Caucasians (GG vs. AG/AA: OR = 1.81, 95%CI = 1.10–2.96,  $P_{\text{heterogeneity}} = 0.02$ ).

**Conclusion:** This meta-analysis suggests that the MCP-1 -2518A/G polymorphism may have some relation to digestive system cancer susceptibility or cancer development in Caucasian. Large-scale and well-designed case-control studies are needed to validate the findings.

**Citation:** Da L-S, Zhang Y, Zhang S, Qian Y-C, Zhang Q, et al. (2013) Association between MCP-1 -2518A/G Polymorphism and Cancer Risk: Evidence from 19 Case-Control Studies. PLoS ONE 8(12): e82855. doi:10.1371/journal.pone.0082855

**Editor:** Xiaoping Miao, MOE Key Laboratory of Environment and Health, School of Public Health, Tongji Medical College, Huazhong University of Science and Technology, China

**Received:** September 26, 2013; **Accepted:** October 29, 2013; **Published:** December 18, 2013

**Copyright:** © 2013 Da et al. This is an open-access article distributed under the terms of the Creative Commons Attribution License, which permits unrestricted use, distribution, and reproduction in any medium, provided the original author and source are credited.

**Funding:** The authors have no support or funding to report.

**Competing Interests:** The authors have declared that no competing interests exist.

\* E-mail: xulin83cn@gmail.com (LX); jiangfeng174@sohu.com (FJ)

† These authors contributed equally to this work.

## Introduction

Cancer is a major public health problem and one of the principal causes of death worldwide [1]. It is predicted that the number of newly diagnosed cancers in the world will increase to more than 15 million and 12 million people will die of cancer in 2020 [2]. It has been widely accepted that carcinogenesis is a consequence of complex inherited and environmental factors. However, the exact mechanism of carcinogenesis remains largely unknown. Epidemiological study points a connection between chronic inflammation and various cancers [3], and it is estimated that 15–20% of all deaths from cancer are associated with infections and inflammatory responses [4].

Monocyte chemo-attractant protein 1 (MCP-1), also known as CCL-2 (CC chemokine ligand 2), is a member of the CC chemokine family which plays an important role in inflammation, and is encoded by the CCL-2 gene which locates on 17q11.2-q12 [5–7]. MCP-1 is involved in a series of diseases including rheumatoid arthritis, chronic obstructive pulmonary disease, cardiovascular disease, and cancer [8]. Being a chemokine, MCP-1 is largely produced by cancer cells and is responsible for

the recruitment of macrophages to many kinds of tumors, including cancers of ovary, breast, bladder, lung, and cervix [9–13], and high concentrations of tumor-associated macrophages (TAMs) are linked to better tumor growth and progression as well as poor prognosis [14]. Therefore, MCP-1 may play a critical role in tumor initiation, promotion, and progression [15].

Several MCP-1 polymorphisms have been reported to be associated with disease susceptibility or severity [16], and the -2518A/G (rs1024611) polymorphism which can increase the expression of MCP-1 was most widely studied [6]. Recently, an increasing number of studies have examined the association between this -2518A/G polymorphism and cancer risk [15–32]. However, individual study may have insufficient power to obtain a comprehensive and reliable conclusion. We, therefore, performed a meta-analysis by pooling all eligible studies to clarify this inconsistency and to achieve a more precise estimation of the relationship between the MCP-1 -2518A/G polymorphism and cancer risk.

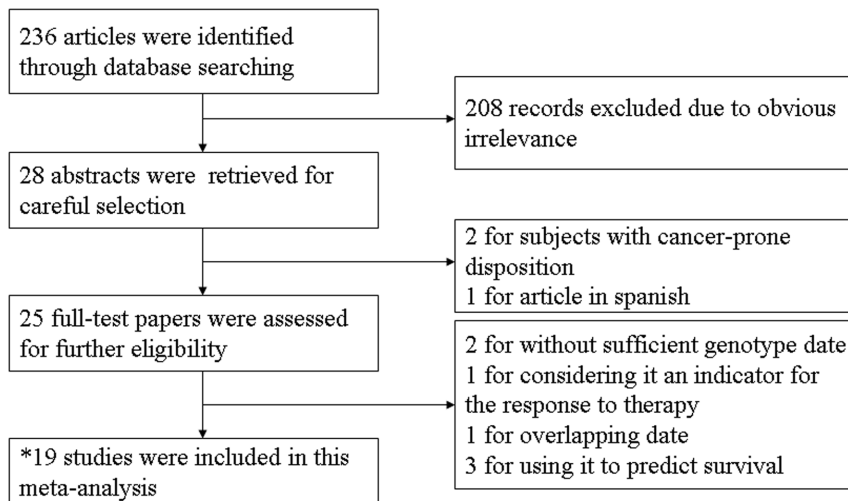

**Figure 1. Flow diagram of the study selection process.** \*a total of 18 articles were identified and two types of cancers were reported in one article, we extracted data separately for each cancer, thus 19 studies were eligible. doi:10.1371/journal.pone.0082855.g001

## Methods

### Identification and eligibility of relevant studies

A systematic search of PubMed and China National Knowledge Infrastructure (CNKI) database (last search updated in June 2013) was carried out to identify case-control studies that investigated the association between the -2518A/G polymorphism and cancer risk. The search strategy was based on combinations of “MCP-1”, “CCL-2”, “cancer”, “carcinoma”, “tumor”; “polymorphism”,

“variant”, “SNP”. In order to minimize potential publication bias, citations in original studies were also screened by manual search to identify additional relevant publications. The selection criteria of the retrieved articles in our meta-analysis were as follows: (1) a case-control design; (2) investigating the -2518A/G polymorphism and cancer risk; (3) sufficient data available to calculate an odds ratio (OR) with 95% confidence interval (CI). The major reasons for exclusion of studies were (1) investigations in subjects

**Table 1. Characteristics of the eligible studies in the meta-analysis.**

| Study           | Year | Country | Ethnicity | Cancer type    | Control source | No. of case/control | Case |     |     | Control |     |     | HWE |
|-----------------|------|---------|-----------|----------------|----------------|---------------------|------|-----|-----|---------|-----|-----|-----|
|                 |      |         |           |                |                |                     | AA   | AG  | GG  | AA      | AG  | GG  |     |
| Liu             | 2013 | China   | Asian     | Renal          | HB             | 416/458             | 59   | 197 | 160 | 93      | 234 | 131 | Yes |
| Arshad          | 2013 | India   | Asian     | Bladder        | PB             | 120/190             | 32   | 64  | 24  | 60      | 87  | 8   | Yes |
| Wu              | 2013 | Taiwan  | Asian     | Cervical       | HB             | 86/253              | 16   | 52  | 18  | 33      | 132 | 88  | Yes |
| Kucukgergin     | 2012 | Turkey  | Caucasian | Bladder        | HB             | 142/197             | 67   | 54  | 21  | 96      | 83  | 18  | Yes |
| Singh           | 2012 | India   | Asian     | Bladder        | HB             | 200/200             | 83   | 101 | 16  | 81      | 97  | 22  | Yes |
| Kuckergergin    | 2012 | Turkey  | Caucasian | Prostate       | HB             | 156/152             | 78   | 67  | 11  | 64      | 71  | 17  | Yes |
| Bektas-Kayhan   | 2012 | Turkey  | Caucasian | Oral           | HB             | 129/140             | 67   | 56  | 6   | 94      | 45  | 1   | Yes |
| Chen            | 2011 | Taiwan  | Asian     | Oral           | HB             | 216/344             | 49   | 112 | 55  | 80      | 172 | 92  | Yes |
| Gu              | 2011 | China   | Asian     | Gastric        | HB             | 608/608             | 94   | 270 | 244 | 138     | 268 | 202 | No  |
| Kruszyna        | 2011 | Poland  | Caucasian | Breast         | PB             | 160/323             | 89   | 54  | 17  | 154     | 145 | 24  | Yes |
| Yeh             | 2010 | Taiwan  | Asian     | Hepatocellular | HB             | 102/344             | 23   | 48  | 31  | 80      | 172 | 92  | Yes |
| Yang            | 2010 | China   | Asian     | Lung           | PB             | 112/82              | 34   | 48  | 30  | 10      | 34  | 38  | Yes |
| Narter          | 2010 | Turkey  | Caucasian | Bladder        | PB             | 72/76               | 48   | 16  | 8   | 40      | 33  | 3   | Yes |
| Attar           | 2010 | Turkey  | Caucasian | Endometrial    | HB             | 50/211              | 26   | 17  | 7   | 124     | 82  | 5   | No  |
| Qin             | 2009 | China   | Asian     | Hepatocellular | PB             | 397/471             | 133  | 182 | 82  | 185     | 225 | 61  | Yes |
| Qin             | 2009 | China   | Asian     | Nasopharyngeal | PB             | 575/471             | 185  | 299 | 91  | 185     | 225 | 61  | Yes |
| Vazquez-Lavista | 2009 | Mexico  | Mixed     | Bladder        | PB             | 47/126              | 9    | 35  | 3   | 18      | 71  | 37  | Yes |
| Sáenz-López     | 2008 | Spain   | Caucasian | Prostate       | PB             | 298/311             | 174  | 100 | 24  | 178     | 123 | 10  | Yes |
| Landi           | 2006 | Spain   | Caucasian | Colorectal     | HB             | 276/251             | 161  | 97  | 18  | 138     | 97  | 16  | Yes |

PB: population-based; HB: hospital-based; HWE: Hardy-Weinberg equilibrium  
doi:10.1371/journal.pone.0082855.t001

**Table 2.** Meta-analysis of the association between the MCP-1 –2518A/G polymorphism and cancer risk in all genetic models.

|                         | N  | GG vs. AA                |                | AG vs. AA       |                | GG/AG vs. AA             |                | GG vs. AG/AA             |                |
|-------------------------|----|--------------------------|----------------|-----------------|----------------|--------------------------|----------------|--------------------------|----------------|
|                         |    | OR                       | P <sub>h</sub> | OR              | P <sub>h</sub> | OR                       | P <sub>h</sub> | OR                       | P <sub>h</sub> |
| Total                   | 20 | 1.28(0.95,1.73)          | <0.001         | 1.00(0.86,1.16) | 0.004          | 1.05(0.89,1.23)          | <0.001         | 1.25(0.97,1.60)          | <0.001         |
| Cancer type             |    |                          |                |                 |                |                          |                |                          |                |
| Digestive system cancer | 6  | <b>1.43(1.05,1.96)*</b>  | 0.081          | 1.17(0.95,1.43) | 0.149          | 1.24(0.99,1.56)          | 0.050          | <b>1.29(1.02,1.64)*</b>  | 0.141          |
| Bladder cancer          | 5  | 1.26(0.47,3.42)          | <0.001         | 0.92(0.66,1.30) | 0.124          | 0.99(0.70,1.39)          | 0.089          | 1.25(0.46,3.39)          | <0.001         |
| Prostate cancer         | 2  | 1.15(0.26,5.16)          | 0.008          | 0.81(0.62,1.07) | 0.808          | 0.87(0.67,1.13)          | 0.337          | 1.27(0.30,5.39)          | 0.008          |
| Others                  | 6  | 1.13(0.59,2.16)          | <0.001         | 0.90(0.63,1.29) | 0.005          | 0.93(0.63,1.38)          | <0.001         | 1.17(0.71,1.92)          | <0.001         |
| Ethnicity               |    |                          |                |                 |                |                          |                |                          |                |
| Asian                   | 10 | 1.22(0.84,1.76)          | <0.001         | 1.15(0.98,1.35) | 0.142          | 1.16(0.94,1.43)          | 0.003          | 1.16(0.88,1.52)          | <0.001         |
| Caucasian               | 8  | 1.67(0.99,2.80)          | 0.012          | 0.85(0.67,1.07) | 0.048          | 0.94(0.75,1.18)          | 0.040          | <b>1.81(1.10,2.96) *</b> | 0.015          |
| Source of control       |    |                          |                |                 |                |                          |                |                          |                |
| PB                      | 9  | 1.50(0.86,2.64)          | <0.001         | 0.88(0.67,1.15) | 0.003          | 0.97(0.74,1.27)          | 0.001          | 1.57(0.94,2.61)          | <0.001         |
| HB                      | 10 | 1.12(0.80,1.58)          | 0.001          | 1.09(0.92,1.29) | 0.152          | 1.11(0.90,1.36)          | 0.008          | 1.07(0.83,1.39)          | 0.005          |
| Sample size             |    |                          |                |                 |                |                          |                |                          |                |
| Large <sup>a</sup>      | 7  | <b>1.59(1.29,1.96) *</b> | 0.173          | 1.13(0.96,1.34) | 0.108          | <b>1.22(1.03,1.45) *</b> | 0.054          | <b>1.38(1.15,1.66) *</b> | 0.124          |
| Small <sup>b</sup>      | 12 | 1.12(0.63,1.99)          | <0.001         | 0.88(0.70,1.11) | 0.026          | 0.91(0.71,1.17)          | 0.002          | 1.19(0.72,1.97)          | <0.001         |

N: number of studies; OR: odds ratio; P<sub>h</sub>: p value for heterogeneity; \*OR with statistical significance; PB: population-based; HB: hospital-based; a: studies with more than 500 participants; b: studies with less than 500 participants.

doi:10.1371/journal.pone.0082855.t002

with cancer-prone disposition; (2) overlapping data; (3) not published in English and Chinese.

### Data extraction

The following information was collected independently by two of the authors (Da and Zhang) for each eligible study: name of first author, published year, country of origin, ethnicity, source of control, cancer type, genotyping method, total number of genotyped cases and controls, genotype frequencies in cases and control, and Hardy–Weinberg equilibrium (HWE) of controls. Ethnicity was categorized as Asian, Caucasian and mixed population. Cancer types were classified as bladder cancer, prostate cancer, digestive system cancer (oral cancer, gastric cancer, colorectal and hepatocellular cancer), and other cancers. All studies were defined as hospital-based (HB) or population-based (PB) according to the source of control. The final results of data extraction were compared carefully, and any disagreements were discussed until reaching conformity on all items among all authors.

### Statistical analysis

For each study, deviation from HWE among controls was evaluated by Pearson's  $\chi^2$ -test and a  $P < 0.05$  was considered as significant disequilibrium. The strength of the associations between the –2518A/G polymorphism and cancer susceptibility was measured by OR with its 95%CI. The pooled ORs and the 95% CIs in each comparison were calculated using the following models: homozygote model (GG vs. AA), heterozygote model (AG vs. AA), dominant model (GG/AG vs. AA) and recessive model (GG vs. AG/AA), respectively. Between-study heterogeneity was assessed by the chi-square based Q test and the heterogeneity was found to be significant when  $P < 0.10$ [33]. The summary ORs were calculated by the fixed-effects model (Mantel-Haenszel method) when the  $P$  value was  $> 0.10$ . Otherwise, the random-effects model (DerSimonian-Laird method) was utilized [34]. The

Z test was applied to determine the significance of the pooled ORs. And a  $P < 0.05$  was considered significant. Sub-group analyses and meta-regression were carried out to explore the source of heterogeneity among variables, including ethnicity, cancer types, source of control and sample size (studies with more than 500 participants were defined as “large”, and studies with less than 500 participants were defined as “small”), respectively. Sensitivity analyses were performed by sequentially removing individual study to evaluate the robustness of the overall estimate. Finally, publication bias was examined by Begg's funnel plot and the Egger's linear regression test, and a  $P < 0.05$  was considered to be representative of statistically significant publication bias [35]. All p-values were two sided, and any statistical tests for this meta-analysis were done with STATA statistical software (version 12.0; StataCorp, College Station, Texas USA).

## Results

### Characteristics of eligible studies

After careful retrieve and selection, 18 eligible articles were identified according to inclusion and exclusion criteria. The study selection procedures were shown in Figure 1. Two types of cancers were reported in Qin's study, and we extracted data separately for each cancer. Therefore, a total of 19 case-control studies with 4,162 cases and 5,173 controls were included in this meta-analysis.

Out of the 19 applicable studies, 17 were published in English and 2 were written in Chinese, 10 of them were studies of Asians, 8 studies of Caucasian and one study of mixed population. According to the source of control, 10 studies were hospital-based and 9 were population-based. The genotype distributions in the controls were in agreement with HWE except for two studies (Gu [23],  $p < 0.01$ ; Attar [28],  $p = 0.04$ ). The genotyping methods in studies were nearly all polymerase chain reaction-restriction fragment length polymorphism. The detailed characteristics of each case-control study were listed in Table 1.

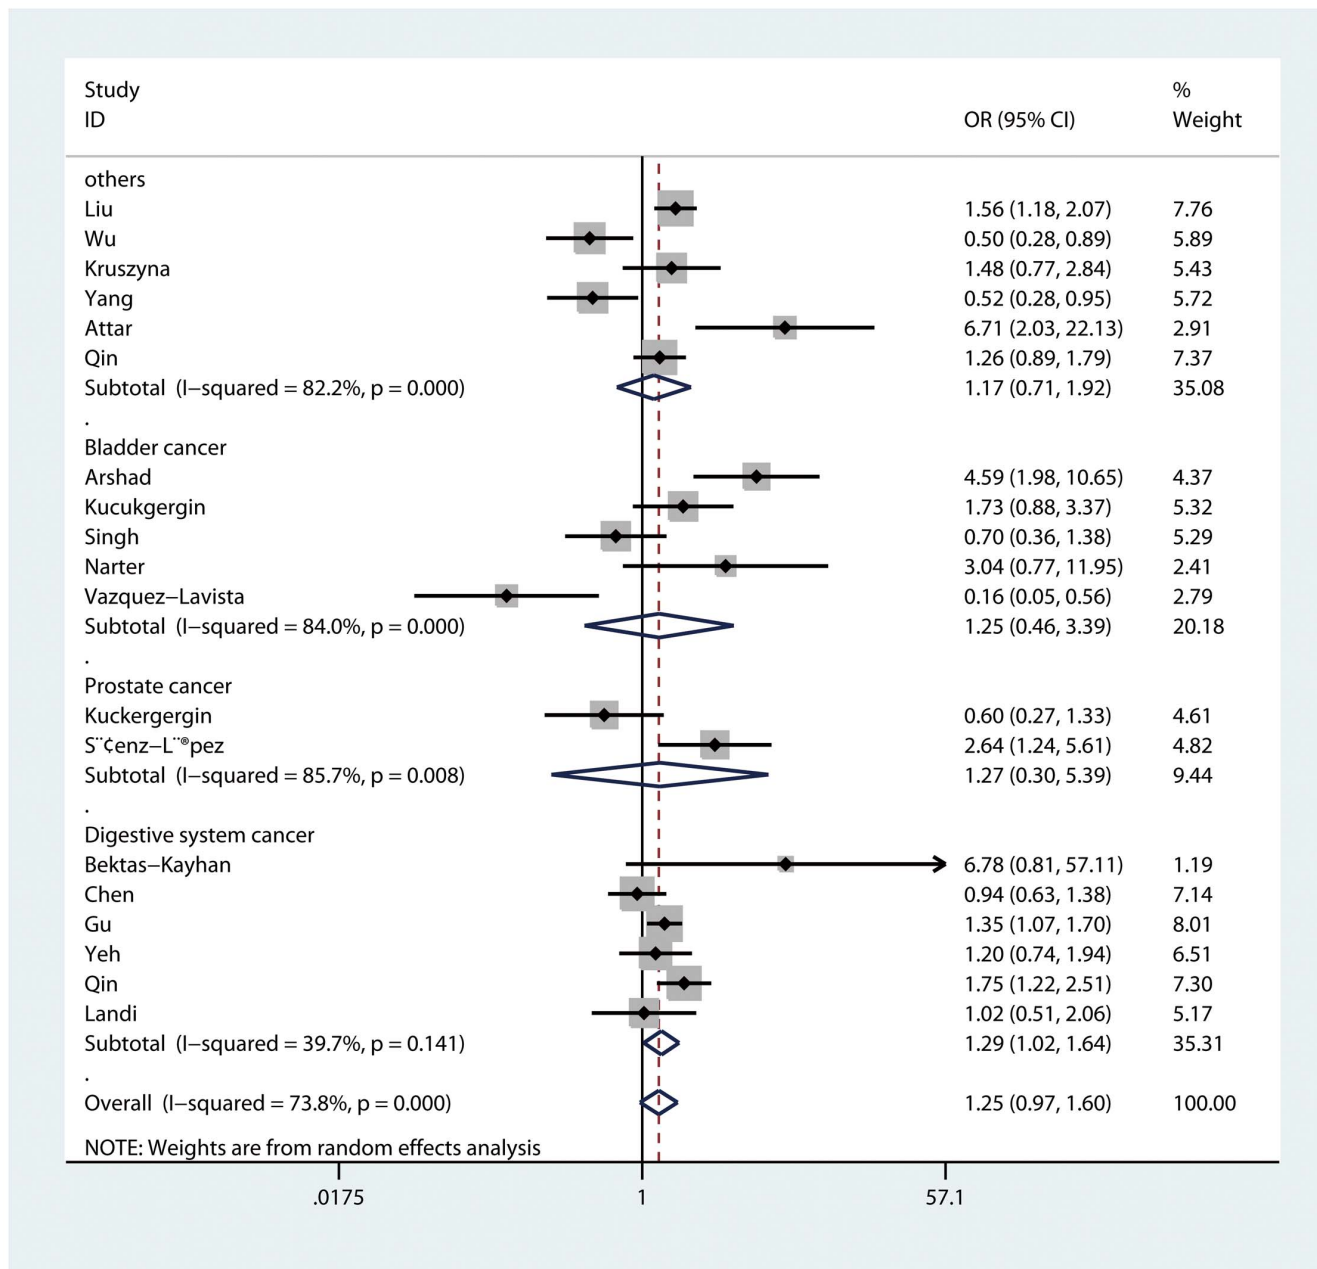

**Figure 2. Forest plot of recessive model for overall comparison by cancer type (GG vs. AG/AA).**  
doi:10.1371/journal.pone.0082855.g002

### Meta-analysis results

Overall, there was no statistically significant association between cancer risk and the -2518A/G polymorphisms in all genetic models (Table 2). However, strong evidence of heterogeneity was found in each comparison. Thus, sub-group analyses were performed to determine the influence of confounding factors.

As for cancer type, a statistically increased cancer risk was found in the comparison of homozygote (GG vs. AA: OR = 1.43, 95%CI = 1.05–1.96,  $P_{\text{heterogeneity}} = 0.08$ ) and recessive model (GG vs. AG/AA: OR = 1.29, 95%CI = 1.02–1.64,  $P_{\text{heterogeneity}} = 0.14$ , Figure 2) for digestive system cancer. However, no significant associations were discovered in bladder cancer, prostate cancer or other cancers.

When stratified by ethnicity, an increased cancer risk was found in the recessive model comparison for Caucasians (GG vs. AG/AA: OR = 1.81, 95%CI = 1.10–2.96,  $P_{\text{heterogeneity}} = 0.02$ , Figure 3). In Asians, however, no significant association but only a trend of increased cancer risk was found in each genetic model.

Further, in the stratified analyses by sample size and source of control, we observed a significantly increased risk in “large” studies in three genetic models: homozygote model (GG vs. AA: OR = 1.59, 95%CI = 0.74–2.05,  $P_{\text{heterogeneity}} = 0.17$ ), recessive model (GG vs. AG/AA: OR = 1.38, 95%CI = 1.15–1.66,  $P_{\text{heterogeneity}} = 0.12$ ) and dominant model (GG/AG vs. AA: OR = 1.22, 95%CI = 1.03–1.45,  $P_{\text{heterogeneity}} = 0.05$ ). However, the cancer cases and controls did not significantly differ in the subgroup analyses according to the source of control.

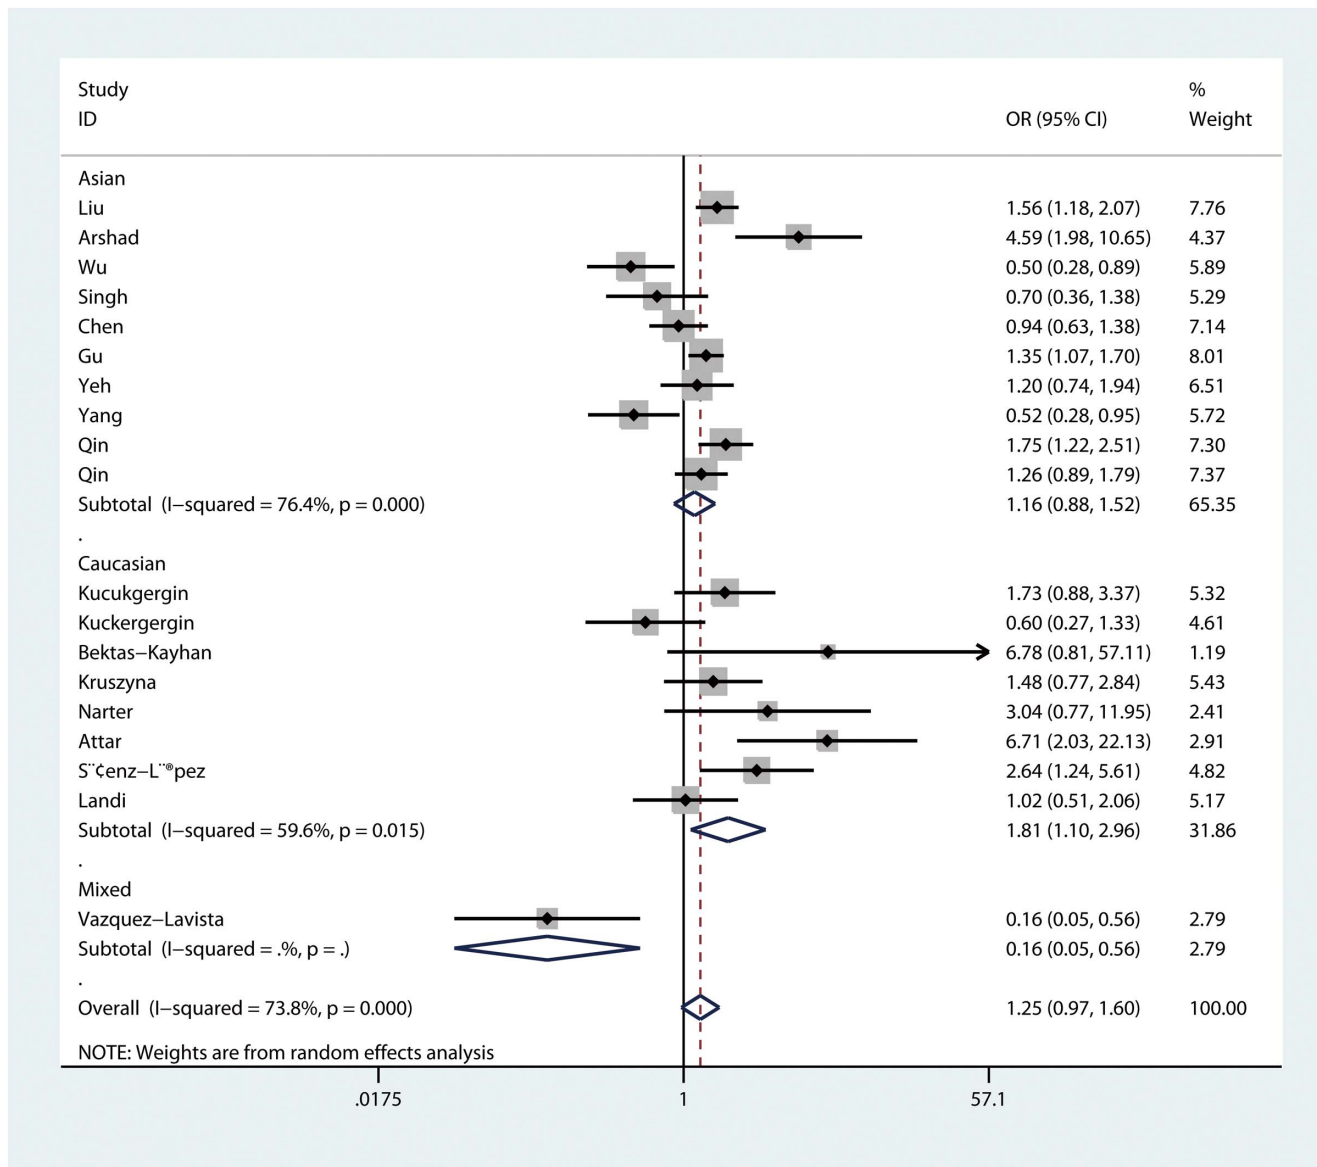

**Figure 3. Forest plot of recessive model for overall comparison by ethnicity (GG vs. AG/AA).**  
doi:10.1371/journal.pone.0082855.g003

### Evaluation of heterogeneity

Between-study heterogeneity was obvious in each model (Table 2). Meta-regression was further conducted to explore the sources of heterogeneity. The results indicated that cancer type ( $P=0.02$ ), but not ethnicity, source of control and sample size ( $P>0.05$ ) contributed to source of heterogeneity.

### Sensitivity analysis and publication bias

A one-way sensitivity analysis was performed to assess the stability of the results of the meta-analysis. Statistically similar results were obtained after sequentially excluding individual studies, which confirmed the robustness of the meta-analysis (data not shown). For publication bias, as shown in Figure 4, the shape of the funnel plot did not reveal any evidence of obvious asymmetry (GG vs. AG/AA:  $P=0.67$ ), and the results of Egger's test also indicated no risk of publication bias (GG vs. AG/AA:  $P=0.96$ ).

### Discussion

The impacts of MCP-1 activation on tumor cells have been demonstrated in a variety of malignancies [8]. It has been shown that the -2518A/G SNP in the regulatory region of MCP-1 gene could affect transcription and increase the expression of MCP-1 [6]. MCP-1 expression was associated with tumorigenesis and metastasis of several solid tumors [23]. The overexpression of MCP-1 has been reported in a wide range of tumors such as glioma, ovarian, esophageal, breast, lung, and prostate cancer [36–38]. In the light of these findings, it is reasonable that the -2518A/G polymorphism may contribute to cancer susceptibility. However, previous case-control studies have yielded inconsistent conclusions. In order to obtain a more precise estimation of this relationship, we performed this meta-analysis including 19 case-control studies with 4,162 cases and 5,173 controls, and the result demonstrated that the MCP-1 -2518A/G polymorphism was not associated with cancer susceptibility in overall analysis.

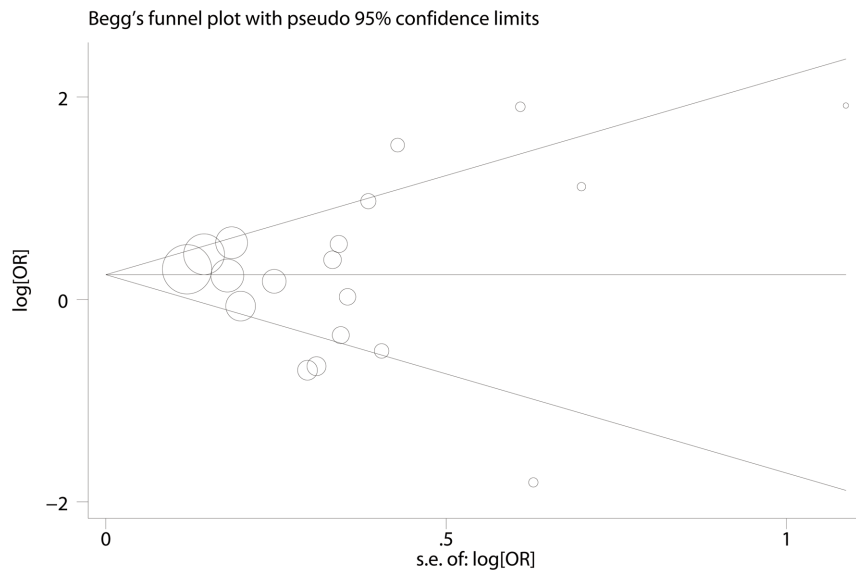

**Figure 4. Begg's funnel plot of MCP-1 -2518A/G polymorphism and cancer risk (GG vs. AG/ AA).**  
doi:10.1371/journal.pone.0082855.g004

Sub-group analysis was conducted to detect the effects of confounding factors. When stratified by ethnicity, there was a significantly increased cancer risk among Caucasians but not in Asians. The differences may be explained by genetic diversities, different risk factors in life styles, and the exposure to different environmental factors. However, it was noteworthy that an increased cancer risk was found in the recessive model for Caucasians, and only two “large” studies were included in this subgroup. It was reported that small size may decrease statistical power and even may produce a fluctuated risk estimate. Therefore, this relationship needs to be further confirmed in larger size, well-designed prospective studies.

In the subgroup analysis by cancer type, no significant association was found except for homozygote model and recessive model comparison of digestive system cancer. This could be explained by the following two reasons: one may be that this polymorphism may play a different role in different cancer sites. The other possible reason is that most studies in this subgroup were “large” studies which have sufficient statistical power to investigate a slight effect compared with “small” studies. In consistent with this explanation, there was a significantly increased cancer risk in “large” studies in three genetic models, but no significant association was observed in “small” studies in any comparison.

Finally, attention should be paid to the relatively huge heterogeneity in this meta-analysis. Meta-regression indicated that cancer type ( $P=0.02$ ), but not ethnicity, source of control or sample size ( $P>0.05$ ) contributed to the source of heterogeneity. In fact, numerous other factors including age, sex ratio, family history and lifestyle may also explain the heterogeneity. Unfortunately, we can not conduct a meta-regression utilizing these variables because detail information was not available.

## References

1. Siegel R, Naishadham D, Jemal A (2013) Cancer statistics, 2013. *CA Cancer J Clin* 63: 11–30.
2. Kanavos P (2006) The rising burden of cancer in the developing world. *Ann Oncol* 17 Suppl 8: viii15–viii23.

Some limitations of this meta-analysis should be addressed. Firstly, only English and Chinese

papers were included in this meta-analysis. Therefore, selection bias may have existed, although not any publication bias was showed in the funnel plot and Egger's tests. Secondly, this meta-analysis was based on unadjusted estimates, because adjusted estimates were not shown in all published studies. Thirdly, no genome-wide association studies (GWAS) data was included in this meta-analysis. As we know, as compared to the candidate-gene approach, GWAS have revolutionized the field of genetic susceptibility and provided a powerful approach to identify the common genetic variants. Therefore, this powerful and comprehensive approach have contributed to unprecedented advances in our understanding of the role of common genetic variation in various cancers[39–42]. However, due to the strict criteria, some low-risk alleles might be overlooked in spite of their potential importance in disease risk.

In conclusion, this meta-analysis suggests that the MCP-1 -2518A/G polymorphism may have some relation to digestive system cancer susceptibility or cancer development in Caucasian. To further confirm the results, large scale case-control studies with different ethnic groups and multiple cancer types are needed.

## Supporting Information

**Checklist S1** PRISMA checklist.  
(DOC)

## Author Contributions

Conceived and designed the experiments: LSD FJ LX. Performed the experiments: LSD YZ. Analyzed the data: LSD YZ SZ. Contributed reagents/materials/analysis tools: LSD YZ YCQ QZ. Wrote the paper: LSD YZ.

3. Balkwill F, Mantovani A (2001) Inflammation and cancer: back to Virchow? *Lancet* 357: 539–545.
4. Mantovani A, Allavena P, Sica A, Balkwill F (2008) Cancer-related inflammation. *Nature* 454: 436–444.

5. Rollins BJ, Walz A, Baggiolini M (1991) Recombinant human MCP-1/JE induces chemotaxis, calcium flux, and the respiratory burst in human monocytes. *Blood* 78: 1112–1116.
6. Rovin BH, Lu L, Saxena R (1999) A novel polymorphism in the MCP-1 gene regulatory region that influences MCP-1 expression. *Biochem Biophys Res Commun* 259: 344–348.
7. Craig MJ, Loberg RD (2006) CCL2 (Monocyte Chemoattractant Protein-1) in cancer bone metastases. *Cancer Metastasis Rev* 25: 611–619.
8. Conti I, Rollins BJ (2004) CCL2 (monocyte chemoattractant protein-1) and cancer. *Semin Cancer Biol* 14: 149–154.
9. Negus RP, Stamp GW, Relf MG, Burke F, Malik ST, et al. (1995) The detection and localization of monocyte chemoattractant protein-1 (MCP-1) in human ovarian cancer. *J Clin Invest* 95: 2391–2396.
10. Ueno T, Toi M, Saji H, Muta M, Bando H, et al. (2000) Significance of macrophage chemoattractant protein-1 in macrophage recruitment, angiogenesis, and survival in human breast cancer. *Clin Cancer Res* 6: 3282–3289.
11. Amann B, Perabo FG, Wirger A, Hugenschmidt H, Schultze-Seemann W (1998) Urinary levels of monocyte chemo-attractant protein-1 correlate with tumour stage and grade in patients with bladder cancer. *Br J Urol* 82: 118–121.
12. Arenberg DA, Keane MP, DiGiovine B, Kunkel SL, Strom SR, et al. (2000) Macrophage infiltration in human non-small-cell lung cancer: the role of CC chemokines. *Cancer Immunol Immunother* 49: 63–70.
13. Riethdorf L, Riethdorf S, Gutzlaff K, Prall F, Loning T (1996) Differential expression of the monocyte chemoattractant protein-1 gene in human papillomavirus-16-infected squamous intraepithelial lesions and squamous cell carcinomas of the cervix uteri. *Am J Pathol* 149: 1469–1476.
14. Mantovani A, Sica A (2010) Macrophages, innate immunity and cancer: balance, tolerance, and diversity. *Curr Opin Immunol* 22: 231–237.
15. Bektas-Kayhan K, Unur M, Boy-Metin Z, Cakmakoglu B (2012) MCP-1 and CCR2 gene variants in oral squamous cell carcinoma. *Oral Dis* 18: 55–59.
16. Pandith AA, Khan NP, Azad NA, Khan MS, Wani MS (2013) Association of Chemokine and Chemokine Receptor Gene Polymorphisms (MCP1 A-2518G and CCR2-V64I) with Urinary Bladder Cancer: A Study in Kashmiri Population. *American Journal of Molecular and Cellular Biology* 1: 1–13.
17. Liu GX, Zhang X, Li S, Koiiche RD, Sindsceii JH, et al. (2013) Monocyte chemotactic protein-1 and CC chemokine receptor 2 polymorphisms and prognosis of renal cell carcinoma. *Tumour Biol* 34: 2741–2746.
18. Wu HH, Lee TH, Tee YT, Chen SC, Yang SF, et al. (2013) Relationships of Single Nucleotide Polymorphisms of Monocyte Chemoattractant Protein 1 and Chemokine Receptor 2 With Susceptibility and Clinicopathologic Characteristics of Neoplasia of Uterine Cervix in Taiwan Women. *Reprod Sci* 20: 1175–1183.
19. Kucukgergin C, Isman FK, Dasdemir S, Cakmakoglu B, Sanli O, et al. (2012) The role of chemokine and chemokine receptor gene variants on the susceptibility and clinicopathological characteristics of bladder cancer. *Gene* 511: 7–11.
20. Singh V, Srivastava P, Srivastava N, Kapoor R, Mittal RD (2012) Association of inflammatory chemokine gene CCL21/D with bladder cancer risk in North Indian population. *Mol Biol Rep* 39: 9827–9834.
21. Kucukgergin C, Isman FK, Cakmakoglu B, Sanli O, Seckin S (2012) Association of polymorphisms in MCP-1, CCR2, and CCR5 genes with the risk and clinicopathological characteristics of prostate cancer. *DNA Cell Biol* 31: 1418–1424.
22. Chen MK, Yeh KT, Chiou HL, Lin CW, Chung TT, et al. (2011) CCR2-64I gene polymorphism increase susceptibility to oral cancer. *Oral Oncol* 47: 577–582.
23. Gu H, Ni M, Guo X, Feng P, Xu Y, et al. (2011) The functional polymorphism in monocyte chemoattractant protein-1 gene increases susceptibility to gastric cancer. *Med Oncol* 28 Suppl 1: S280–285.
24. Kruszyna L, Lianeri M, Rubis B, Knula H, Ryzczynska M, et al. (2011) CCL2 -2518 A/G single nucleotide polymorphism as a risk factor for breast cancer. *Mol Biol Rep* 38: 1263–1267.
25. Yeh CB, Tsai HT, Chen YC, Kuo WH, Chen TY, et al. (2010) Genetic polymorphism of CCR2-64I increased the susceptibility of hepatocellular carcinoma. *J Surg Oncol* 102: 264–270.
26. Yang L, Shi GL, Song CX, Xu SF (2010) Relationship between genetic polymorphism of MCP-1 and non-small-cell lung cancer in the Han nationality of North China. *Genet Mol Res* 9: 765–771.
27. Narter KF, Agachan B, Sozen S, Cincin ZB, Isbir T (2010) CCR2-64I is a risk factor for development of bladder cancer. *Genet Mol Res* 9: 685–692.
28. Attar R, Agachan B, Kuran SB, Cacina C, Sozen S, et al. (2010) Association of CCL2 and CCR2 gene variants with endometrial cancer in Turkish women. *In Vivo* 24: 243–248.
29. Qin J-n (2009). Exploration on the relation between genetic polymorphism in TGF- $\beta$  signaling pathway and hepatocellular carcinoma and nasopharyngeal carcinoma. Guangxi Medical University: [D] Guangxi.
30. Saenz-Lopez P, Carretero R, Cozar JM, Romero JM, Canton J, et al. (2008) Genetic polymorphisms of RANTES, IL-1A, MCP-1 and TNF-A genes in patients with prostate cancer. *BMC Cancer* 8: 382.
31. Vazquez-Lavista LG, Lima G, Gabilondo F, Llorente L (2009) Genetic association of monocyte chemoattractant protein 1 (MCP-1)-2518 polymorphism in Mexican patients with transitional cell carcinoma of the bladder. *Urology* 74: 414–418.
32. Landi S, Gemignani F, Bottari F, Gioia-Patricola L, Guino E, et al. (2006) Polymorphisms within inflammatory genes and colorectal cancer. *J Negat Results Biomed* 5: 15.
33. Lau J, Ioannidis JP, Schmid CH (1997) Quantitative synthesis in systematic reviews. *Ann Intern Med* 127: 820–826.
34. DerSimonian R, Laird N (1986) Meta-analysis in clinical trials. *Control Clin Trials* 7: 177–188.
35. Egger M, Davey Smith G, Schneider M, Minder C (1997) Bias in meta-analysis detected by a simple, graphical test. *BMJ* 315: 629–634.
36. Melgarejo E, Medina MA, Sanchez-Jimenez F, Urdiales JL (2009) Monocyte chemoattractant protein-1: a key mediator in inflammatory processes. *Int J Biochem Cell Biol* 41: 998–1001.
37. Cai Z, Chen Q, Chen J, Lu Y, Xiao G, et al. (2009) Monocyte chemotactic protein 1 promotes lung cancer-induced bone resorptive lesions in vivo. *Neoplasia* 11: 228–236.
38. Lu Y, Cai Z, Galson DL, Xiao G, Liu Y, et al. (2006) Monocyte chemotactic protein-1 (MCP-1) acts as a paracrine and autocrine factor for prostate cancer growth and invasion. *Prostate* 66: 1311–1318.
39. Zhong R, Liu L, Zou L, Zhu Y, Chen W, et al. (2013) Genetic Variations in TERT-CLPTM1L Locus Are Associated With Risk of Lung Cancer in Chinese Population. *Mol Carcinog*. 52 Suppl 1: 118–126.
40. Zhong R, Liu L, Zou L, Sheng W, Zhu B, et al. (2013) Genetic variations in the TGF $\beta$  signaling pathway, smoking and risk of colorectal cancer in a Chinese population. *Carcinogenesis* 34: 936–942.
41. Chen W, Zhong R, Ming J, Zou L, Zhu B, et al. (2012) The SLC4A7 variant rs4973768 is associated with breast cancer risk: evidence from a case-control study and a meta-analysis. *Breast Cancer Res Treat* 136: 847–857.
42. Wu C, Miao X, Huang L, Che X, Jiang G, et al. (2012) Genome-wide association study identifies five loci associated with susceptibility to pancreatic cancer in Chinese populations. *Nat Genet* 44: 62–66.
